# Supplementary material
Source: MDPI journal article supplement (https://www.mdpi.com/2073-4352/10/8/646)

# PXRD patterns obtained from the single crystal data

compound 1

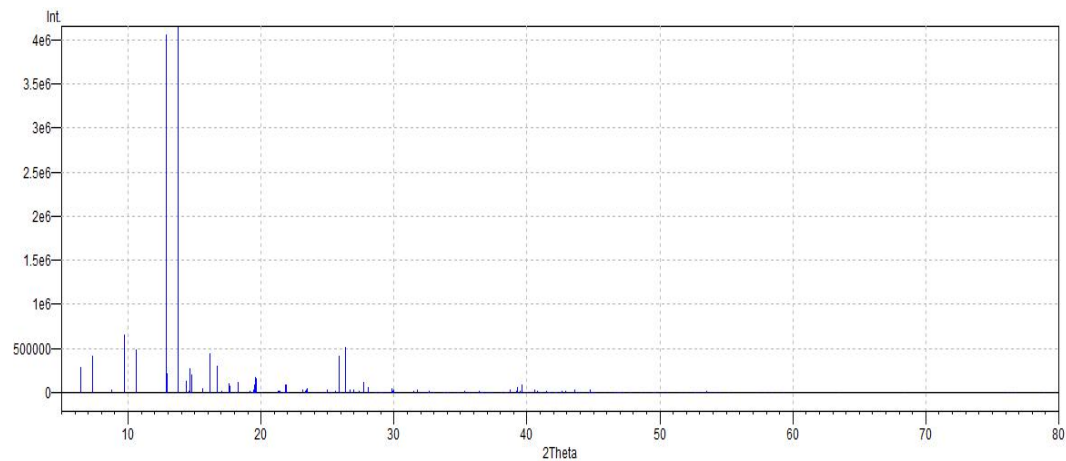

compound 2

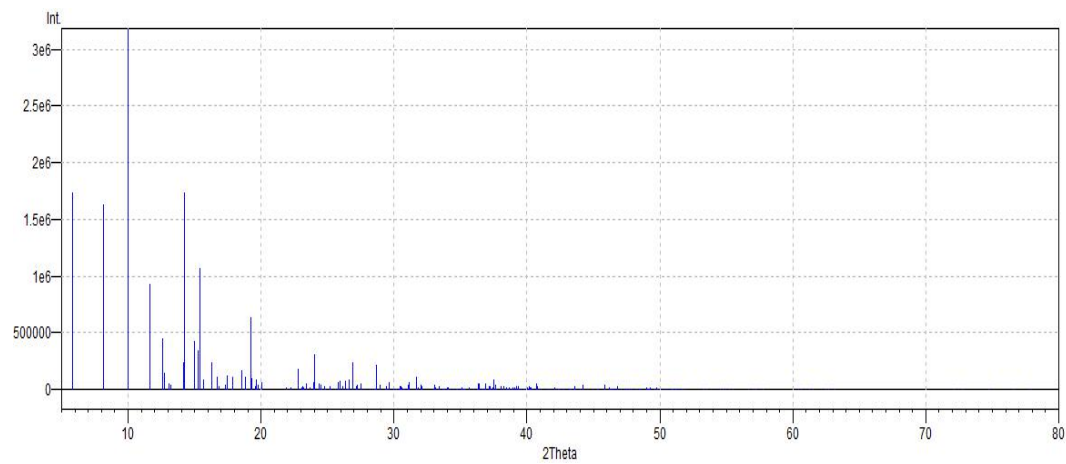

compound 3

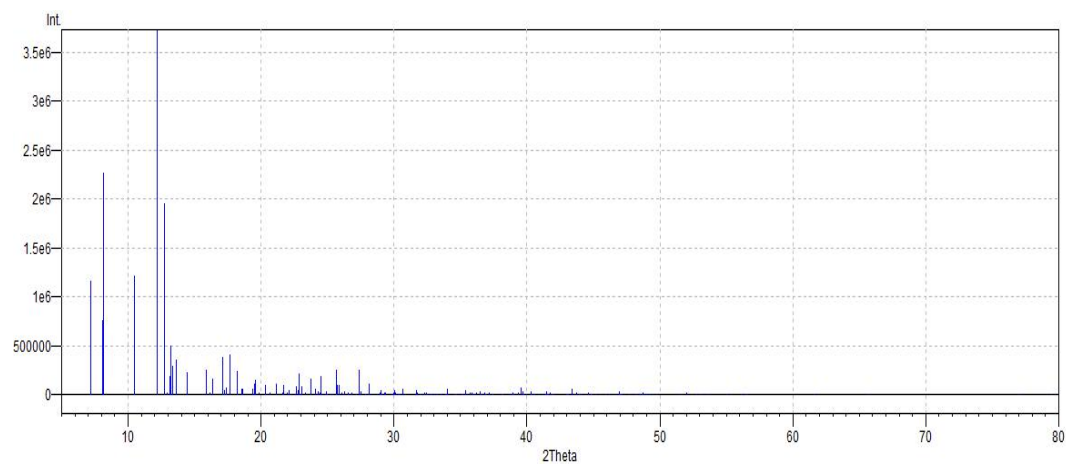

compound 4

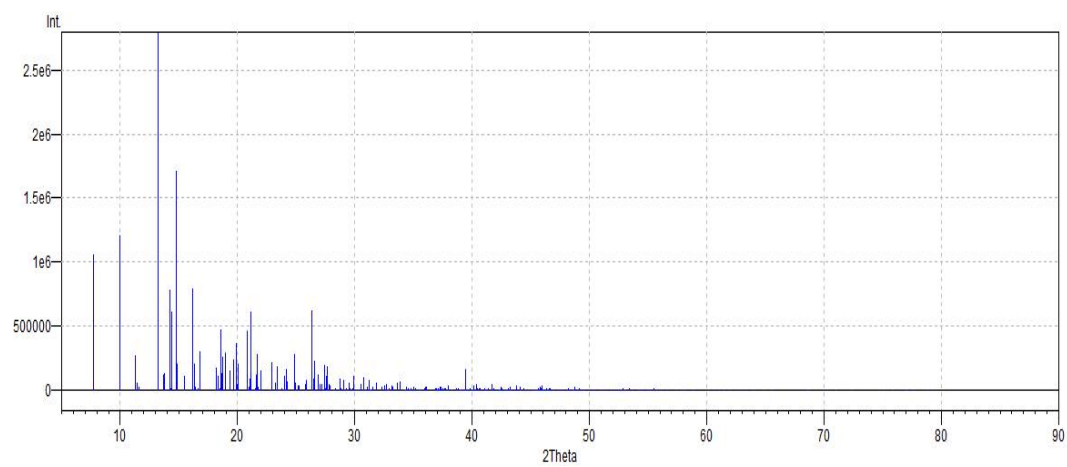

Supplement: s1 [file s1]
